# Supplementary material for: Hydrothermal humification mechanism of typical agricultural waste biomass: a case study of corn straw
Source: Royal Society of Chemistry journal article supplement (doi:10.1039/d2gc04694f), 2023-01-01
Supplement: d2gc04694f1.pdf [file d2gc04694f1.pdf]

Supporting Information for

**Hydrothermal humification mechanism of typical agricultural waste biomass: A  
case study of corn straw**

Xiongxin Peng<sup>a,b1</sup>, Shuang Gai<sup>a,b1</sup>, Kui Cheng<sup>b,c</sup>, Fan Yang<sup>a,b\*</sup>

<sup>a</sup> School of Water Conservancy and Civil Engineering, Northeast Agricultural University, Harbin 150030, China.

<sup>b</sup> Heilongjiang Provincial International Joint Laboratory of Smart Soil, Harbin 150030, China.

<sup>c</sup> College of Engineering, Northeast Agricultural University, Harbin 150030, China.

These authors contributed equally: Xiongxin Peng, Shuang Gai.

## Text S1

### Alkali-dissolved barium chloride precipitation potentiometric titration

Alkaline solubilized barium chloride precipitation potentiometric titration is used to determine the total acid functional groups of A-HA, mainly the phenolic hydroxyl and carboxyl groups in their molecules. The standard solutions used included 0.1 mol/L NaOH solution, 0.1 mol/L BaCl<sub>2</sub> solution and 0.1 mol/L HCl solution. Specific methods are as follows: 20 mg of A-HA sample was accurately weighed in a 50mL centrifuge tube, 10 mL 0.1mol/L NaOH solution was added to dissolve, then 25 mL 0.1 mol/L BaCl<sub>2</sub> solution was added, centrifuged after shaking for several minutes, 25mL supernatant was removed, and 0.1 mol/L HCl solution was used for potential titration. The endpoint of titration was pH 8.4, the blank test performed simultaneously. The total acid group is calculated by Equation 1.

$$C_{ad} = \frac{(V_2 - V_1) \times c(HCl)}{m} \times \frac{35}{25}$$

(1)

Where:  $V_2$  is the volume of acid used for blank titration, mL;  $V_1$  is the volume of acid used for sample titration, mL;  $c(HCl)$  is the concentration of hydrochloric acid standard solution, mol/L;  $m$  is the mass of sample, g.

### Physical-chemical analysis

The elemental contents of C, H, N and S in AHAs were measured in an elemental analyzer (FlashSmart, Thermo, USA). The pH was analyzed by a pH meter (PHSJ-5T). The functional groups on the surfaces of the AHAs were analyzed by Fourier transform infrared spectroscopy (FT-IR, Nicolet iS50, Thermo Fisher Scientific, USA) using KBr

pellets over the wavelength range of 400–4000  $\text{cm}^{-1}$ . AHA solution of 50 mg/L was prepared with 5 mmol/L NaOH and then 3D EEM analysis was performed in a RF-6000 fluorometer (F-7100FL, Hitachi, Japan). The range of emission wavelength ( $E_m$ ) is 300–650nm, the range of excitation wavelength ( $E_x$ ) is 250–450nm, the scanning speed is set to 1200 nm/min, both procedures have an interval of 5 nm. The ultraviolet (UV) absorbance of AHA solution (50 mg/L) at 250, 254 and 365 nm was analyzed by UV–vis spectroscopy (UV-1800, Shanghai precision scientific instruments, China). The concentrations of furfural (FF) and 5-hydroxymethylfurfural (5-HMF) produced in each trial during hydrothermal reaction were determined by high pressure liquid chromatography (HPLC; Shimadzu LC20A, Japan) at 254 nm, equipped with an C18 column ( $250 \times 4.6$  mm). The mobile phase was consisted of methanol and water (0.3% acetic acid) mixed at a ratio of 1:9 (v/v), and the flow rate was set at 0.6  $\text{mL min}^{-1}$ . Glucose, fructose and xylose were also detected by HPLC coupled with 3-methyl-1-phenyl-2-pyrazolin-5-one (PMP) pre-column derivatization [1]. The mobile phase was constituted by 0.02  $\text{mol L}^{-1}$   $\text{KH}_2\text{PO}_4$  buffer and methanol (9:1 v/v), column oven at 35°C, flow rate at 0.8  $\text{mL min}^{-1}$ , the detection wavelength at 250 nm. The graphitization degree of AHA was characterized by Raman spectroscopy (Thermo Fischer DXR, Thermo Scientific, USA), the excitation wavelength was 514 nm, the scanning range was 50–3500  $\text{cm}^{-1}$ , and the scanning step was 0.966  $\text{cm}^{-1}$ . The analysis of elements on solid surface for AHA was carried out by the X-ray photoelectron spectroscopy (XPS, K-Alpha, Thermo Scientific, USA) by using Al  $K\alpha$  radiation. The functional groups present in AHA was measured by  $^{13}\text{C}$  nuclear magnetic resonance (NMR) analysis

(Bruker AVANCE III HD 600 NMR spectrometer, Germany). Ultrahigh resolution mass spectra were acquired using a Bruker Solari X FT-ICR-MS equipped with a 15.0 T superconducting magnet and a dual-mode ESI/MALDI ion source. The magnitude-averaged molecular characteristics including  $O/C_w$ ,  $H/C_w$ , molecular weight ( $MW_w$ ), double bond equivalent ( $DBE_w$ ), and aromaticity index ( $AI_w$ ) were calculated [2].

## Figures

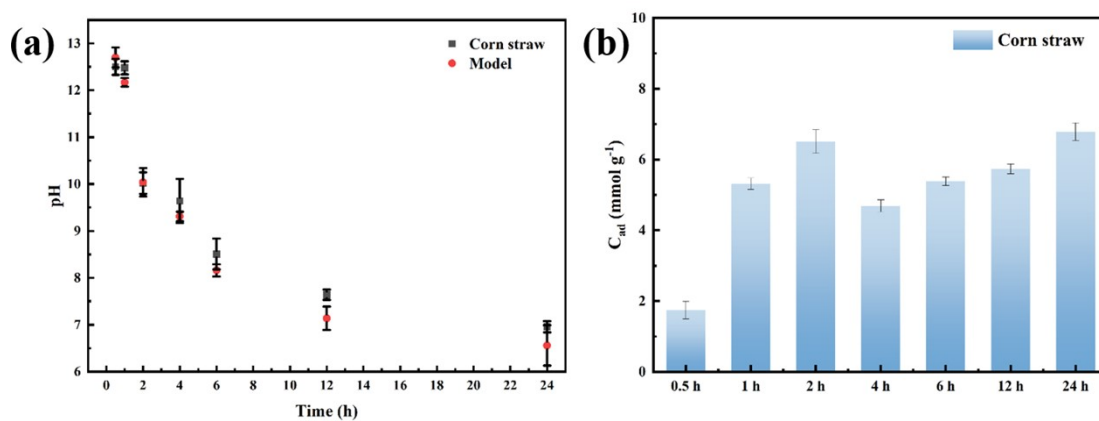

**Fig. S1.** (a) The pH of reaction system after hydrothermal treatment at different time; (b) Total acid group concentration of A-HA at different times.

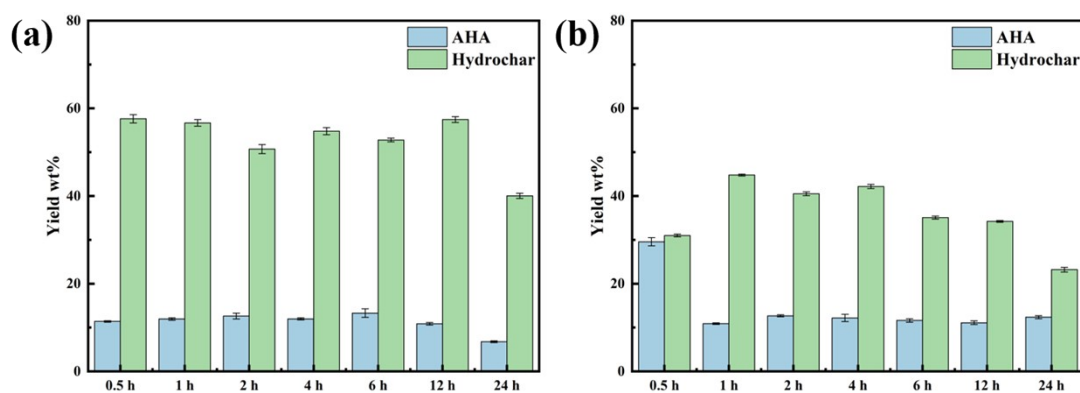

**Fig. S2.** The yield of A-HA and hydrochar at different times (a) corn straw; (b) the Model.

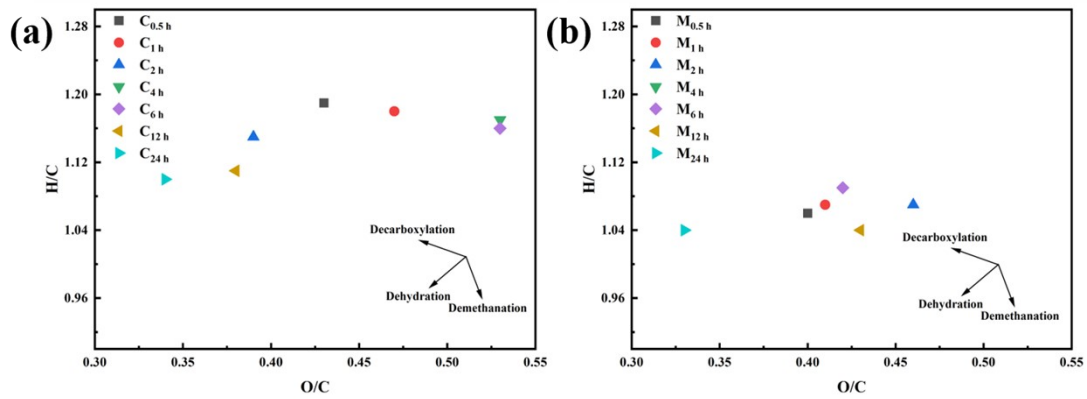

Fig. S3. Van Krevelen diagram of A-HA at different times (a) corn straw; (b) the Model.

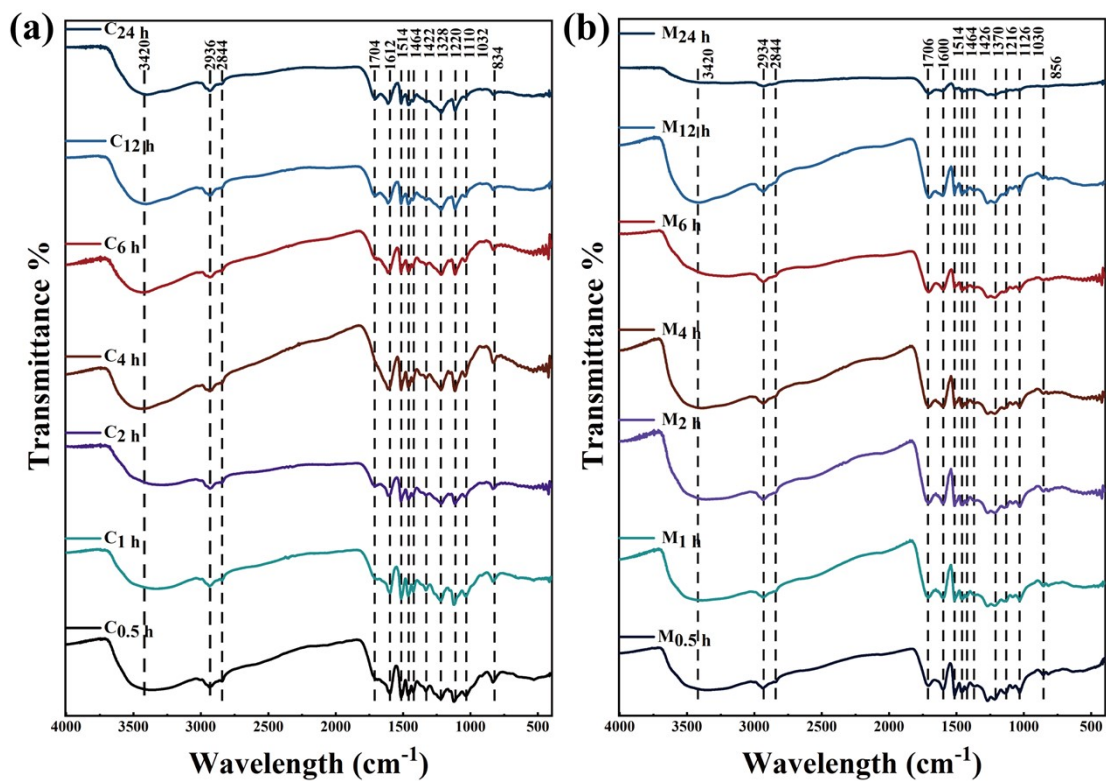

Fig. S4. FT-IR of corn straw A-HA (a) and Model A-HA (b) at different reaction times.

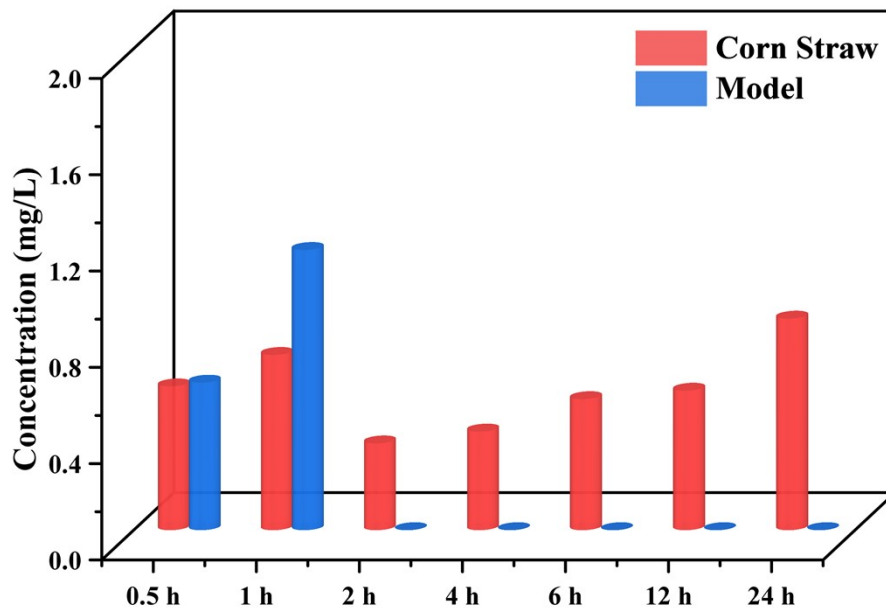

Fig. S5. The concentrations of furfural at different reaction times.

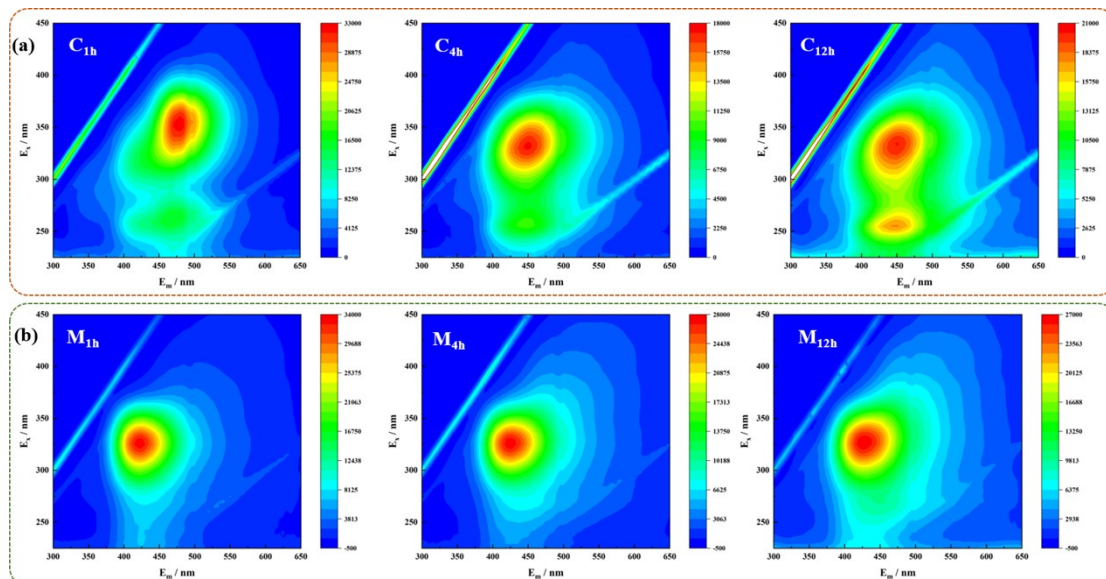

Fig. S6. The 3D EEM spectra of A-HA at different reaction times for corn straw (a), for Model (b).

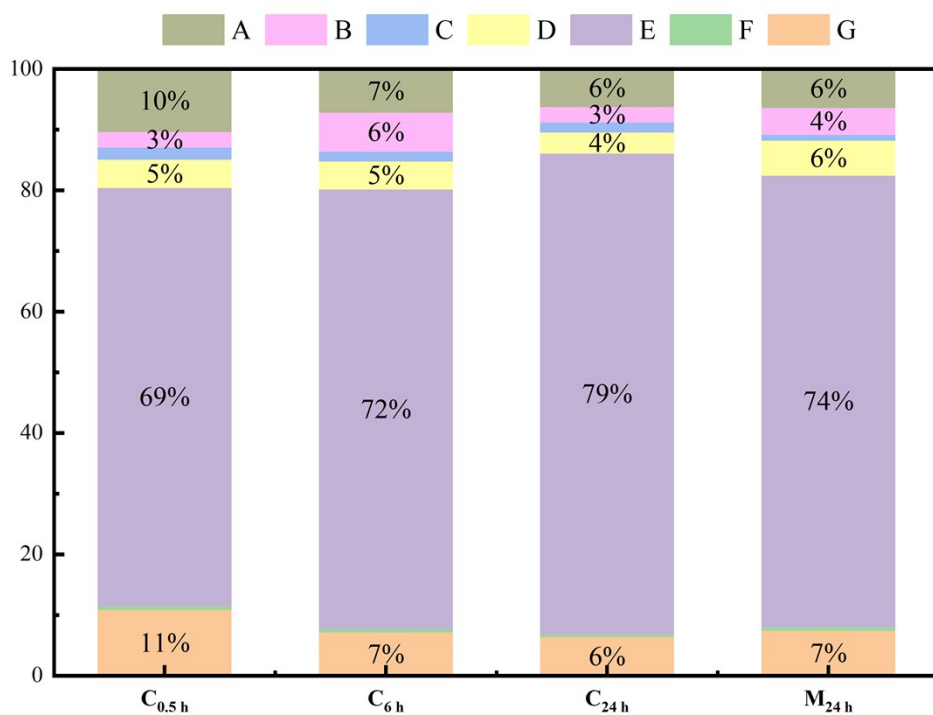

**Fig. S7.** Proportion of the seven components of the FT-ICR-MS (A-G are condensed aromatics, tannins, lignin, unsaturated hydrocarbons, carbohydrates, proteins and lipids separately.)

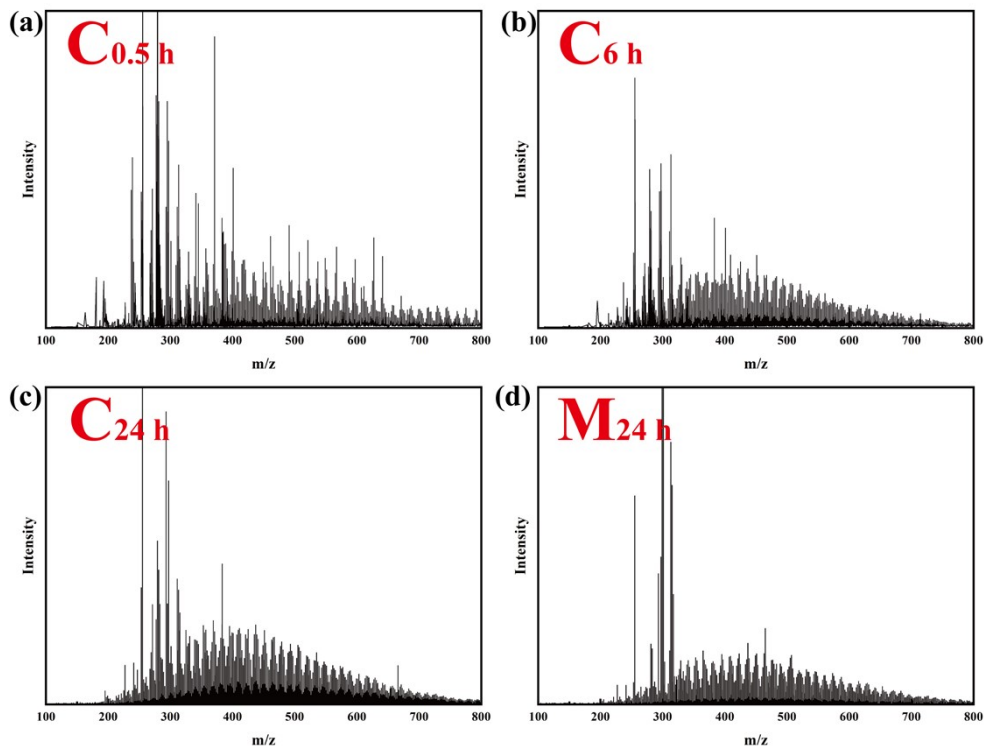

**Fig. S8.** The broadband ESI-FT-ICR-MS spectra of A-HA at different reaction times, corn straw:

(a) 0.5 h, (b) 6 h, (c) 24 h; (d) Model: 24h.

## Tables

**Table S1.** The element analysis of A-HA at different time.

|                    | N (wt%) | C (wt%) | H (wt%) | S (wt%) | O (wt%) | H/C  | O/C  |
|--------------------|---------|---------|---------|---------|---------|------|------|
| Corn straw         | 1.20    | 38.00   | 5.10    | 1.02    | 54.68   | 1.61 | 1.08 |
| C <sub>0.5 h</sub> | 0.94    | 58.24   | 5.79    | 1.46    | 33.58   | 1.19 | 0.43 |
| C <sub>1 h</sub>   | 0.88    | 57.46   | 5.67    | 0.00    | 35.99   | 1.18 | 0.47 |
| C <sub>2 h</sub>   | 0.79    | 61.13   | 5.88    | 0.53    | 31.67   | 1.15 | 0.39 |
| C <sub>4 h</sub>   | 0.71    | 55.19   | 5.40    | 0.00    | 38.70   | 1.17 | 0.53 |
| C <sub>6 h</sub>   | 0.96    | 54.56   | 5.27    | 0.56    | 38.65   | 1.16 | 0.53 |
| C <sub>12 h</sub>  | 0.87    | 61.78   | 5.74    | 0.00    | 31.61   | 1.11 | 0.38 |
| C <sub>24 h</sub>  | 1.21    | 63.73   | 5.85    | 0.63    | 28.59   | 1.10 | 0.34 |
| M <sub>0.5 h</sub> | 0.43    | 61.23   | 5.43    | 0.00    | 32.91   | 1.06 | 0.40 |
| M <sub>1 h</sub>   | 0.44    | 60.95   | 5.42    | 0.00    | 33.19   | 1.07 | 0.41 |
| M <sub>2 h</sub>   | 0.39    | 58.61   | 5.21    | 0.00    | 35.79   | 1.07 | 0.46 |
| M <sub>4 h</sub>   | 0.39    | 54.27   | 4.95    | 0.00    | 40.40   | 1.09 | 0.56 |
| M <sub>6 h</sub>   | 0.43    | 60.37   | 5.46    | 0.00    | 33.74   | 1.09 | 0.42 |
| M <sub>12 h</sub>  | 0.42    | 60.09   | 5.20    | 0.00    | 34.30   | 1.04 | 0.43 |
| M <sub>24 h</sub>  | 0.49    | 64.45   | 5.57    | 0.00    | 29.50   | 1.04 | 0.33 |

Note: O (%) = 100 – N (wt %) – C (wt %) – H (wt %) – S (wt %).



**Table S2.** Surface element composition and surface functional group distribution of A-HA

|                    | C (%) | C-C (%) | C-O (%) | C=O (%) | COO (%) | O (%) | N (%) | Si (%) | S (%) | P (%) |
|--------------------|-------|---------|---------|---------|---------|-------|-------|--------|-------|-------|
| C <sub>0.5 h</sub> | 55.96 | 61.68   | 32.97   | 2.72    | 2.62    | 18.09 | 1.38  | 0.92   | 0.31  | 0.78  |
| C <sub>6 h</sub>   | 61.40 | 70.21   | 21.80   | 7.50    | 0.50    | 18.14 | 1.64  | 0.64   | 0.35  | 0.57  |
| C <sub>24 h</sub>  | 75.07 | 77.25   | 21.32   | 0.66    | 0.77    | 13.78 | 1.60  | 1.60   | 0.30  | 0.57  |

**Table S3.** 3D EEM interval and their associated characteristics

| Region | Wavelength range            | The material properties         |
|--------|-----------------------------|---------------------------------|
| C1     | E <sub>x</sub> = 200-250 nm | Amino acids and proteins        |
|        | E <sub>m</sub> = 280-380 nm |                                 |
| C2     | E <sub>x</sub> = 200-250 nm | Fulvic acid-like substances     |
|        | E <sub>m</sub> = 380-600 nm |                                 |
| C3     | E <sub>x</sub> = 250-400 nm | Dissolved microbial metabolites |

C4

 $E_m = 280-380 \text{ nm}$  $E_x = 250-400 \text{ nm}$  $E_m = 380-600 \text{ nm}$ 

Humic acids-like substances

**Table S4.** Weighted average of A-HA molecular related parameters

| Sample | Number of assigned formulas | (Molecular formula) <sub>w</sub>             | MW <sub>w</sub> | (O/C) <sub>w</sub> | (H/C) <sub>w</sub> | AI <sub>w</sub> | DBE <sub>w</sub> |
|--------|-----------------------------|----------------------------------------------|-----------------|--------------------|--------------------|-----------------|------------------|
| C0.5h  | 3321                        | $C_{27.95}H_{29.57}O_{6.84}N_{0.62}S_{0.13}$ | 487.80          | 0.29               | 1.11               | 0.44            | 14.17            |
| C6h    | 3515                        | $C_{26.37}H_{29.68}O_{7.38}N_{0.95}S_{0.23}$ | 485.40          | 0.30               | 1.16               | 0.39            | 12.35            |
| C24h   | 4817                        | $C_{27.34}H_{29.19}O_{7.25}N_{0.72}S_{0.07}$ | 486.13          | 0.27               | 1.03               | 0.43            | 13.75            |
| M24h   | 3465                        | $C_{27.33}H_{29.90}O_{6.84}N_{0.66}S_{0.22}$ | 484.13          | 0.24               | 1.05               | 0.42            | 13.38            |

**Table S5.** The functional group distribution in the <sup>13</sup>C NMR of A-HA

| Sample            | Alkyl (%)<br>0-45ppm | Methoxyl (%)<br>45-63ppm | Carbohydrate (%)<br>63-108ppm | Aryl (%)<br>108-148ppm | O-Aryl (%)<br>148-165ppm | Carboxyl (%)<br>165-190ppm | Carbonyl (%)<br>190-220ppm | Aliphatic<br>C (%) | Aromatic<br>C (%) | Aromaticity<br>(%) | Aliphaticity<br>(%) |
|-------------------|----------------------|--------------------------|-------------------------------|------------------------|--------------------------|----------------------------|----------------------------|--------------------|-------------------|--------------------|---------------------|
| C <sub>0.5h</sub> | 5.49                 | 48.37                    | 1.95                          | 34.79                  | 7.12                     | 1.75                       | 0.54                       | 55.81              | 41.91             | 42.89              | 57.11               |
| C <sub>6h</sub>   | 5.69                 | 38.36                    | 3.13                          | 41.23                  | 2.60                     | 2.18                       | 6.82                       | 47.18              | 43.83             | 48.16              | 51.84               |
| C <sub>24h</sub>  | 4.82                 | 31.84                    | 1.76                          | 45.39                  | 6.86                     | 3.60                       | 5.70                       | 38.42              | 52.25             | 57.63              | 42.37               |
| M <sub>24h</sub>  | 6.21                 | 32.90                    | 4.37                          | 49.40                  | 3.07                     | 3.03                       | 2.56                       | 43.48              | 52.47             | 54.68              | 45.12               |

Aromaticity =  $100 * \text{Aromatic C (93-165 ppm)} / (\text{Aromatic C (93-165 ppm)} + \text{Aliphatic C (0-93 ppm)})$ ; Aliphaticity =  $100 * \text{Aliphatic C (0-93 ppm)} / (\text{Aromatic C (93-165 ppm)} + \text{Aliphatic C (0-93 ppm)})$ .

## References

- [1] M. Wen, Y. Cui, C. Dong, L. Zhang, Quantitative changes in monosaccharides of Keemun black tea and qualitative analysis of theaflavins-glucose adducts during processing. *Food Res. Int.*, 2021, 148, 110588.
- [2] K. Sun, L. Han, W. Y. Yang, X. Xia, Z. Yang, Wu, F. Li, F. Yan, B. Xing, Application of Hydrochar Altered Soil Microbial Community Composition and the Molecular Structure of Native Soil Organic Carbon in a Paddy Soil. *Environ. Sci. Technol.* 2020, 54, 2715–2725.
